# Supplementary material for: Trapping and thermal migration of the first- and second-row atoms in Ar, Kr and Xe crystals
Source: Royal Society of Chemistry journal article supplement (doi:10.1039/d3cp04178f), 2023-11-15
Supplement: d3cp04178f1.pdf [file d3cp04178f1.pdf]

## Trapping and thermal migration of the first- and second-row atoms in Ar, Kr and Xe crystals.

Iosif V. Leibin,<sup>a</sup> Dmitry S. Bezrukov,<sup>b</sup> and Alexei A. Buchachenko<sup>c</sup>

---

<sup>a</sup> Skolkovo Institute of Science and Technology, Skolkovo Innovation Center, Moscow 121205, Russia; E-mail: iosif.leibin@skoltech.ru.

<sup>b</sup> Department of Chemistry, M.V. Lomonosov Moscow State University, Moscow 119991, Russia.

<sup>c</sup> Skolkovo Institute of Science and Technology, Skolkovo Innovation Center, Moscow 121205, Russia.

## I. AB INITIO CALCULATIONS OF THE DIATOMIC POTENTIALS

All ab initio calculations were performed in the MOLPRO program package using the restricted version of the coupled cluster method with single, double and noniterative triple excitations (RCCSD(T)) along with and the correlation-consistent aug-cc-pV5Z basis sets for H-Ne atoms<sup>73-76</sup> with the addition of 3s3p2d2f1 bond function set placed at the midpoint of internuclear distance.

All guest atoms were taken in their respective ground states (doublet was assumed for H, Li, B, C and F, triplet for oxygen, quartet for nitrogen and singlet for the rest). For Ar, scalar relativistic X2C correction was employed and the specially optimized aug-cc-pV5Z-X2C basis set<sup>77,78</sup> was used. In case of Kr and Xe relativistic effects were to some degree incorporated via the effective core pseudopotentials<sup>80</sup> (ECP10MDF and ECP28MDF for Kr and Xe, respectively) and supplementary aug-cc-pV5Z-PP basis sets<sup>79,80</sup> were used for the representation of the outer electronic shells. In order to separate  $V_{\Sigma}$ ,  $\text{cm}^{-1}$  and  $V_{\Pi}$ ,  $\text{cm}^{-1}$  states of the diatomic the number of occupied molecular orbitals with certain angular momenta was enforced and ensured by orbital rotation when needed. Interaction energies were computed over a tight grid of interatomic distances from 1.8 to 25 Å and corrected for basis set superposition error using the full counterpoise correction scheme<sup>82</sup>.

The calculated potentials were approximated by the piecewise-analytic dependence ( $e^{-\alpha r}$  – cubic spline –  $Ar^{-6}$ ), described in greater detail in Ref. 83. The raw data points used in the construction of the potentials are presented in tables below. Evident distance grid non-uniformity stems from the fact that different diatomic curves have their important features at different distances and in order to construct a realistic interpolation, additional data points were sometimes calculated and added.

Many-body interactions involving guest atoms were not accounted for, but a calculation on a model system showed that they constitute around 5% of the total interaction energy. Due to the same sign of the many-body contributions to interaction energy, they are expected to have negligible effect on stability diagrams and trapping site structures, but may influence TIM barriers and their impact is one of the possible reasons for TIM barrier overestimation.

TABLE S.1: Results of CCSD(T) calculation for H–RG diatomics

| R, Å | Ar                       | Kr           | Xe           |
|------|--------------------------|--------------|--------------|
|      | Energy, cm <sup>-1</sup> |              |              |
| 25   | -0.000391188             | -0.00054505  | -0.000844143 |
| 22   | -0.000826265             | -0.001206387 | -0.00182684  |
| 20   | -0.001492966             | -0.002148052 | -0.003246087 |
| 17   | -0.003988927             | -0.005745766 | -0.008673186 |
| 15   | -0.008506124             | -0.012260133 | -0.018524738 |
| 12   | -0.032941606             | -0.047568165 | -0.072136938 |
| 10   | -0.100338917             | -0.145199297 | -0.221194591 |
| 9    | -0.191782744             | -0.278137113 | -0.425488604 |
| 8    | -0.398270033             | -0.57927463  | -0.891041271 |
| 7    | -0.921130573             | -1.345800148 | -2.087908087 |
| 6    | -2.463840187             | -3.617898786 | -5.669992864 |
| 5.5  | -4.301594292             | -6.330899641 | -9.933126992 |
| 5.3  | -5.445364577             | -8.012474458 | -12.5483975  |
| 5.2  | -6.142462053             | -9.033020897 | -14.12252506 |
| 5.1  | -6.93951744              | -10.19536362 | -15.90183232 |
| 5    | -7.850500088             | -11.51762812 | -17.90722528 |
| 4.9  | -8.890531557             | -13.01890844 | -20.15845922 |
| 4.8  | -10.07582997             | -14.7184643  | -22.67235746 |
| 4.7  | -11.42306231             | -16.63450784 | -25.45996479 |
| 4.6  | -12.94865461             | -18.78231931 | -28.52233995 |
| 4.5  | -14.66703249             | -21.17116022 | -31.84744602 |
| 4.4  | -16.5876091              | -23.79989683 | -35.38579993 |
| 4.3  | -18.71134935             | -26.6506161  | -39.07055394 |
| 4.2  | -21.0251071              | -29.67967114 | -42.76074227 |
| 4.1  | -23.4940859              | -32.80520668 | -46.27713877 |
| 4    | -26.05030452             | -35.88974565 | -49.32207134 |
| 3.9  | -28.5768042              | -38.71612857 | -51.44373183 |
| 3.8  | -30.88502579             | -40.95451434 | -52.03856177 |
| 3.7  | -32.68264122             | -42.11817246 | -50.25004496 |
| 3.6  | -33.52778699             | -41.50564361 | -44.90498423 |
| 3.5  | -32.76721433             | -38.12624313 | -34.42724125 |
| 3.4  | -29.45681909             | -30.60474778 | -16.73546699 |
| 3.3  | -22.26484592             | -17.05903941 | 10.88702306  |
| 3.2  | -9.348459458             | 5.05826298   | 51.96576507  |
| 3.1  | 11.81743923              | 39.16316417  | 111.050103   |
| 3    | 44.67435057              | 89.79216084  | 193.9517064  |
| 2.9  | 93.88104379              | 162.9012384  | 307.9975335  |
| 2.8  | 165.6781138              | 266.2176146  | 462.309248   |
| 2.7  | 268.3198097              | 409.6645981  | 668.164843   |
| 2.6  | 412.5843839              | 605.8941299  | 939.5321393  |
| 2.5  | 612.4172252              | 870.9860376  | 1294.138581  |

|     |             |             |             |
|-----|-------------|-------------|-------------|
| 2.4 | 885.8103156 | 1225.370975 | 1754.763623 |
| 2.3 | 1255.88368  | 1695.002434 | 2351.043036 |
| 2.2 | 1752.07687  | 2312.97679  | 3122.458951 |
| 2.1 | 2411.670839 | 3122.082122 | 4123.56947  |
| 2   | 3281.990473 | 4178.663875 | 5431.265276 |
| 1.9 | 4423.699262 | 5557.926553 | 7154.891464 |
| 1.8 | 5915.225598 | 7361.644151 | 9451.612163 |

TABLE S.2: Results of CCSD(T) calculation for He–RG diatomics

| R, Å | Ar                       | Kr           | Xe           |
|------|--------------------------|--------------|--------------|
|      | Energy, cm <sup>-1</sup> |              |              |
| 25   | -0.000211688             | -0.000210914 | -0.000389329 |
| 22   | -0.000395579             | -0.000515221 | -0.000836333 |
| 20   | -0.000696942             | -0.000956573 | -0.001483422 |
| 17   | -0.001915592             | -0.002636799 | -0.003952485 |
| 15   | -0.004064205             | -0.005677636 | -0.008428051 |
| 12   | -0.015765228             | -0.022114218 | -0.032706651 |
| 10   | -0.047745907             | -0.067340822 | -0.099884753 |
| 9    | -0.090925911             | -0.128550241 | -0.191404456 |
| 8    | -0.187868572             | -0.266455465 | -0.398651402 |
| 7    | -0.429905359             | -0.612397171 | -0.924137626 |
| 6    | -1.134660463             | -1.62526848  | -2.480795496 |
| 5.5  | -1.971406603             | -2.836088554 | -4.339302409 |
| 5.3  | -2.496284537             | -3.594633686 | -5.489569422 |
| 5.2  | -2.818736319             | -4.058982013 | -6.185973    |
| 5.1  | -3.190149613             | -4.591865783 | -6.976546131 |
| 5    | -3.618635388             | -5.203573012 | -7.871428692 |
| 4.9  | -4.113566106             | -5.905479604 | -8.879865355 |
| 4.8  | -4.685564316             | -6.709848001 | -10.00898262 |
| 4.7  | -5.346587217             | -7.629357471 | -11.26174384 |
| 4.6  | -6.109743213             | -8.676305624 | -12.6338142  |
| 4.5  | -6.98951154              | -9.861213231 | -14.10870735 |
| 4.4  | -8.000688338             | -11.1905169  | -15.65054801 |
| 4.3  | -9.157282633             | -12.66295131 | -17.19328179 |
| 4.2  | -10.47027108             | -14.26364438 | -18.62530787 |
| 4.1  | -11.94369033             | -15.95534419 | -19.7669507  |
| 4    | -13.56852375             | -17.6644484  | -20.33817565 |
| 3.9  | -15.3123613              | -19.26016133 | -19.90223018 |
| 3.8  | -17.10493196             | -20.52342675 | -17.83931462 |
| 3.7  | -18.81276584             | -21.1015339  | -13.19264062 |
| 3.6  | -20.20271681             | -20.44212189 | -4.585466916 |
| 3.5  | -20.88756755             | -17.69712467 | 10.01234423  |
| 3.4  | -20.24622173             | -11.58272804 | 33.48004057  |
| 3.3  | -17.30636744             | -0.17593857  | 69.9419709   |

|     |              |             |             |
|-----|--------------|-------------|-------------|
| 3.2 | -10.56542498 | 19.37892921 | 125.2616513 |
| 3.1 | 2.27794507   | 51.2905574  | 207.741515  |
| 3   | 24.71928363  | 101.7184021 | 329.069709  |
| 2.9 | 62.02044516  | 179.6159059 | 505.5975351 |
| 2.8 | 122.0335399  | 297.9144868 | 760.0620082 |
| 2.7 | 216.3904555  | 475.1815544 | 1123.896623 |
| 2.6 | 362.2146291  | 737.9335249 | 1640.327334 |
| 2.5 | 584.567922   | 1123.844842 | 2368.481701 |
| 2.4 | 919.9182281  | 1686.169129 | 3388.753706 |
| 2.3 | 1421.019002  | 2499.774548 | 4809.73175  |
| 2.2 | 2163.759441  | 3669.30046  | 6776.977773 |
| 2.1 | 3256.676942  | 5340.037166 | 9483.798112 |
| 2   | 4853.919615  | 7712.164006 | 13184.19755 |
| 1.9 | 7172.654365  | 11059.00776 | 18208.25847 |
| 1.8 | 10516.07669  | 15750.08998 | 24979.91515 |

TABLE S.3: Results of CCSD(T) calculation for Li-RG diatomics

| R, Å | Ar                       | Kr           | Xe           |
|------|--------------------------|--------------|--------------|
|      | Energy, cm <sup>-1</sup> |              |              |
| 25   | -0.003464798             | -0.005132922 | -0.008233356 |
| 22   | -0.007505948             | -0.01124188  | -0.017886856 |
| 20   | -0.01341386              | -0.020111059 | -0.031940707 |
| 17   | -0.036331151             | -0.054318124 | -0.086199322 |
| 15   | -0.078218998             | -0.117160911 | -0.185992727 |
| 12   | -0.3120122               | -0.467875429 | -0.744793505 |
| 10   | -0.987459866             | -1.485210963 | -2.375555517 |
| 9    | -1.94736423              | -2.934971459 | -4.708955109 |
| 8    | -4.184419433             | -6.317702122 | -10.15520391 |
| 7.8  | -4.926376366             | -7.440784123 | -11.95635155 |
| 7.6  | -5.817492529             | -8.790185092 | -14.11923201 |
| 7.4  | -6.888342266             | -10.41239526 | -16.71175439 |
| 7.2  | -8.175047311             | -12.36176902 | -19.82026691 |
| 7    | -9.71922202              | -14.70079724 | -23.53452667 |
| 6.9  | -10.60228503             | -16.0380152  | -25.65093944 |
| 6.8  | -11.5677402              | -17.49925315 | -27.95762663 |
| 6.7  | -12.62152661             | -19.09380229 | -30.46732087 |
| 6.6  | -13.76991118             | -20.83068319 | -33.19200982 |
| 6.5  | -15.01836841             | -22.71826421 | -36.14194028 |
| 6.4  | -16.371274               | -24.76373566 | -39.32496443 |
| 6.3  | -17.83176434             | -26.97242283 | -42.74575943 |
| 6.2  | -19.4005533              | -29.34725081 | -46.40500926 |
| 6.1  | -21.07629046             | -31.88800455 | -50.29858705 |
| 6    | -22.85381104             | -34.59058394 | -54.41635378 |
| 5.9  | -24.72390196             | -37.44637632 | -58.74054898 |

|     |              |              |              |
|-----|--------------|--------------|--------------|
| 5.8 | -26.67283812 | -40.44078115 | -63.24362479 |
| 5.7 | -28.68007168 | -43.55170122 | -67.8853769  |
| 5.6 | -30.71815051 | -46.7468122  | -72.60939335 |
| 5.5 | -32.7505292  | -49.98057161 | -77.34010089 |
| 5.4 | -34.72935691 | -53.18987266 | -81.97654008 |
| 5.3 | -36.5940362  | -56.29065276 | -86.3882954  |
| 5.2 | -38.26711937 | -59.1735714  | -90.40831805 |
| 5.1 | -39.64959027 | -61.69983079 | -93.82660359 |
| 5   | -40.61276686 | -63.69564535 | -96.38346979 |
| 4.9 | -40.98613472 | -64.94521722 | -97.7640507  |
| 4.8 | -40.54356524 | -65.18377251 | -97.59667473 |
| 4.7 | -38.99277018 | -64.09299472 | -95.45471221 |
| 4.6 | -35.97709884 | -61.30191232 | -90.86128224 |
| 4.5 | -31.09880717 | -56.39179145 | -83.29063278 |
| 4.4 | -23.94097109 | -48.89747575 | -72.16189301 |
| 4.3 | -14.07028516 | -38.29634929 | -56.82645946 |
| 4.2 | -1.003626038 | -23.99115073 | -36.56548389 |
| 4.1 | 15.83222685  | -5.300299668 | -10.60922916 |
| 4   | 37.11207606  | 18.5297336   | 21.82372877  |
| 3.8 | 96.02508101  | 84.70412307  | 109.113661   |
| 3.6 | 181.8683225  | 180.1150398  | 231.3597217  |
| 3.4 | 300.2507035  | 309.3012046  | 395.2064824  |
| 3.2 | 454.6895912  | 475.8086574  | 609.6324106  |
| 3   | 645.7581059  | 684.106935   | 899.46592    |
| 2.8 | 874.9075312  | 950.7778393  | 1335.984376  |
| 2.6 | 1160.405492  | 1339.661831  | 2100.840683  |
| 2.4 | 1581.720767  | 2038.724496  | 3606.853623  |
| 2.2 | 2385.451275  | 3509.568877  | 6720.971608  |
| 2   | 4217.468719  | 6804.095903  | 13195.32009  |
| 1.8 | 8614.899898  | 14193.94982  | 26438.74687  |

TABLE S.4: Results of CCSD(T) calculation for Be–RG diatomics

| R, Å | Ar                       | Kr           | Xe           |
|------|--------------------------|--------------|--------------|
|      | Energy, cm <sup>-1</sup> |              |              |
| 25   | -0.001816011             | -0.002764313 | -0.004344833 |
| 22   | -0.003867364             | -0.006046243 | -0.009414154 |
| 20   | -0.007059468             | -0.010807901 | -0.016774324 |
| 17   | -0.01949471              | -0.029065347 | -0.045039768 |
| 15   | -0.042350396             | -0.062370457 | -0.096694794 |
| 12   | -0.166659752             | -0.24546986  | -0.381702618 |
| 10   | -0.517445318             | -0.762629747 | -1.191556626 |
| 9    | -1.00321187              | -1.482292438 | -2.32560734  |
| 8    | -2.125407848             | -3.150316698 | -4.968904864 |
| 7    | -5.057732339             | -7.51965817  | -11.93611471 |

|      |              |              |              |
|------|--------------|--------------|--------------|
| 6.5  | -8.230912346 | -12.22838825 | -19.43344306 |
| 6    | -13.83354448 | -20.5002901  | -32.47763709 |
| 5.9  | -15.38855083 | -22.79498308 | -36.05981601 |
| 5.8  | -17.12905779 | -25.36236911 | -40.04503727 |
| 5.7  | -19.07582905 | -28.23029868 | -44.46699956 |
| 5.6  | -21.25071882 | -31.42599452 | -49.35636273 |
| 5.5  | -23.71528998 | -34.97465039 | -54.73631974 |
| 5.4  | -26.37254606 | -38.8976245  | -60.619149   |
| 5.3  | -29.35626951 | -43.21036015 | -67.00043679 |
| 5.2  | -32.63748973 | -47.91856935 | -73.85254205 |
| 5.1  | -36.21573987 | -53.01258689 | -81.116346   |
| 5    | -40.07746534 | -58.45951515 | -88.6901308  |
| 4.9  | -44.1887863  | -64.19258308 | -96.41285606 |
| 4.8  | -48.4865769  | -70.09755806 | -104.0400915 |
| 4.7  | -52.86280887 | -75.99455796 | -111.2129163 |
| 4.6  | -57.15004389 | -81.61505821 | -117.4218351 |
| 4.5  | -61.09757316 | -86.57275966 | -121.9560837 |
| 4.4  | -64.34858756 | -90.32757541 | -123.9054812 |
| 4.3  | -66.40676914 | -92.14327839 | -122.0043169 |
| 4.2  | -66.59568435 | -91.03739665 | -114.6609504 |
| 4.1  | -64.00792275 | -85.72033477 | -99.81935757 |
| 4.05 | -61.3086023  | -80.97582986 | -88.78990693 |
| 4    | -57.43270654 | -74.51149514 | -74.84279051 |
| 3.95 | -52.16527941 | -66.0352528  | -57.52996371 |
| 3.9  | -45.25897627 | -55.21198344 | -36.3460178  |
| 3.85 | -36.42957356 | -41.65773296 | -10.68745759 |
| 3.8  | -25.35245388 | -24.9346726  | 19.96289981  |
| 3.75 | -11.65909345 | -4.547263426 | 56.41067049  |
| 3.7  | 5.067003198  | 20.06014796  | 99.37949697  |
| 3.6  | 49.55082286  | 84.46803737  | 208.2764928  |
| 3.5  | 112.5686322  | 174.004136   | 354.2262555  |
| 3.4  | 199.6721615  | 295.5059144  | 546.2204495  |
| 3.2  | 474.705501   | 668.5647151  | 1113.353636  |
| 3    | 947.047944   | 1289.545878  | 2022.121199  |
| 2.8  | 1717.218363  | 2275.261648  | 3423.548646  |
| 2.6  | 2911.590072  | 3768.304735  | 5518.155779  |
| 2.4  | 4668.571305  | 5943.649527  | 8621.877334  |
| 2.2  | 7141.234483  | 9064.772931  | 13343.71407  |
| 2    | 10598.96988  | 13750.88436  | 21151.71565  |
| 1.8  | 15933.69144  | 21818.15764  | 35578.97788  |

---

TABLE S.5: Results of CCSD(T) calculation for B–RG diatomics

| R, Å | Ar                        |                              | Kr                        |                              | Xe                        |                              |
|------|---------------------------|------------------------------|---------------------------|------------------------------|---------------------------|------------------------------|
|      | $V_{\Pi}, \text{cm}^{-1}$ | $V_{\Sigma}, \text{cm}^{-1}$ | $V_{\Pi}, \text{cm}^{-1}$ | $V_{\Sigma}, \text{cm}^{-1}$ | $V_{\Pi}, \text{cm}^{-1}$ | $V_{\Sigma}, \text{cm}^{-1}$ |
| 25   | -0.001339415              | -0.00142158                  | -0.001980528              | -0.002146093                 | -0.003065626              | -0.003338931                 |
| 22   | -0.002883481              | -0.003198692                 | -0.004341128              | -0.004732902                 | -0.006654557              | -0.007275984                 |
| 20   | -0.005289368              | -0.005764392                 | -0.007751619              | -0.008488932                 | -0.011848598              | -0.013005294                 |
| 17   | -0.014255395              | -0.015690399                 | -0.020797746              | -0.022964536                 | -0.031721396              | -0.035116455                 |
| 15   | -0.030544403              | -0.033837859                 | -0.044451402              | -0.049590724                 | -0.067901591              | -0.075813224                 |
| 12   | -0.118712962              | -0.134355429                 | -0.17296242               | -0.196977109                 | -0.264688047              | -0.302372386                 |
| 10   | -0.362748504              | -0.421960941                 | -0.52939185               | -0.620871158                 | -0.814538691              | -0.958172227                 |
| 9    | -0.69448609               | -0.828940102                 | -1.016490157              | -1.220249998                 | -1.569367291              | -1.892289268                 |
| 8    | -1.445250609              | -1.785803741                 | -2.123059012              | -2.634885368                 | -3.295470022              | -4.112463779                 |
| 7    | -3.362700135              | -4.333611774                 | -4.956826078              | -6.417460321                 | -7.75959112               | -10.07719095                 |
| 6    | -9.043079234              | -12.05243174                 | -13.37973626              | -17.81368983                 | -21.23295619              | -27.87181234                 |
| 5.5  | -15.81204533              | -20.72955176                 | -23.51870391              | -30.50049142                 | -37.48339757              | -46.95320676                 |
| 5.3  | -20.04250539              | -25.70777134                 | -29.83223866              | -37.61982737                 | -47.55783396              | -57.20795415                 |
| 5.1  | -25.58569658              | -31.65096596                 | -38.05504855              | -45.92906015                 | -60.59396646              | -68.62931363                 |
| 5    | -28.96984031              | -34.94608662                 | -43.04980245              | -50.43051957                 | -68.45541743              | -74.49085891                 |
| 4.8  | -37.22633894              | -41.88679494                 | -55.18242228              | -59.59502118                 | -87.34912766              | -85.30524648                 |
| 4.6  | -47.83831915              | -48.38482806                 | -70.68025022              | -67.46028764                 | -111.0419738              | -91.86221795                 |
| 4.5  | -54.17724068              | -50.87143034                 | -79.85338866              | -69.91655913                 | -124.8271134              | -91.68954719                 |
| 4.45 | -57.62864179              | -51.75892483                 | -84.81234628              | -70.50358515                 | -132.1917927              | -90.24198298                 |
| 4.4  | -61.27611523              | -52.32066463                 | -90.01914879              | -70.52089401                 | -139.8827204              | -87.66395434                 |
| 4.35 | -65.11753727              | -52.47397093                 | -95.4686143               | -69.83850755                 | -147.8492542              | -83.70100922                 |
| 4.3  | -69.15303828              | -52.12030388                 | -101.1509558              | -68.30423374                 | -156.0707031              | -78.10315008                 |
| 4.25 | -73.37363766              | -51.14302265                 | -107.0482754              | -65.74048473                 | -164.505208               | -70.57052893                 |
| 4.2  | -77.76738923              | -49.40483826                 | -113.1376758              | -61.94049983                 | -173.0980149              | -60.75864278                 |
| 4.15 | -82.31584386              | -46.74424457                 | -119.3853809              | -56.66420413                 | -181.7797647              | -48.27294429                 |
| 4.1  | -86.99285966              | -42.97324482                 | -125.7471152              | -49.63351439                 | -190.4647916              | -32.66312083                 |
| 4.05 | -91.763364                | -37.87162132                 | -132.1657292              | -40.52707464                 | -199.0491684              | -13.41680406                 |
| 4    | -96.58207413              | -31.18420071                 | -138.5689215              | -28.97434438                 | -207.4085795              | 10.04746217                  |
| 3.95 | -101.3900776              | -22.61434487                 | -144.8666518              | -14.54894774                 | -215.3957468              | 38.38801583                  |
| 3.9  | -106.1150072              | -11.81874401                 | -150.9483239              | 3.238774232                  | -222.8369907              | 72.34918974                  |
| 3.85 | -110.6668515              | 1.598878007                  | -156.6791852              | 24.95012585                  | -229.528202               | 112.7717861                  |
| 3.8  | -114.9354941              | 18.09508921                  | -161.8969323              | 51.22746052                  | -235.2293632              | 160.6055402                  |
| 3.75 | -118.7881701              | 38.19553208                  | -166.4072194              | 82.80444735                  | -239.6578112              | 216.9228054                  |
| 3.7  | -122.0652991              | 62.50349648                  | -169.9788778              | 120.5180785                  | -242.4806068              | 282.9357903                  |
| 3.65 |                           | 91.71144912                  |                           |                              |                           |                              |
| 3.6  | -126.0875206              | 126.6154129                  | -173.1635607              | 218.2999539                  | -241.6690039              | 449.7023338                  |
| 3.55 |                           | 168.1292067                  |                           |                              |                           |                              |
| 3.5  | -124.9603482              | 217.3020214                  | -168.631396               | 353.8797346                  | -228.7671261              | 674.1038751                  |
| 3.4  | -115.7670039              | 343.6080011                  | -152.5089599              | 539.2682793                  | -198.3560251              | 972.8200036                  |
| 3.35 | -106.9268739              |                              | -138.5211807              | 655.3116264                  | -174.4559706              | 1156.364168                  |
| 3.3  | -94.43779913              | 517.3649091                  | -119.5331603              | 789.9146162                  | -143.4073229              | 1366.63553                   |



|      |              |             |              |             |             |             |
|------|--------------|-------------|--------------|-------------|-------------|-------------|
| 3.25 | -77.56140197 |             | -94.60952679 | 945.6863012 | -104.04446  | 1606.980384 |
| 3.2  | -55.44611919 | 753.9228039 | -62.68105141 | 1125.564085 | -55.0587381 | 1881.096688 |
| 3.15 | -27.11438397 |             | -22.53046399 | 1332.848819 | 5.029469778 | 2193.072297 |
| 3.1  | 8.553745684  | 1073.050541 | 27.22296272  | 1571.244475 | 77.90524292 | 2547.428324 |
| 3.05 | 52.83887124  |             | 88.14481424  | 1844.901245 | 165.4953834 | 2949.157075 |
| 3    | 107.2043471  | 1500.085504 | 162.0076792  | 2158.463143 | 270.0036741 | 3403.755017 |
| 2.95 | 173.3175797  |             | 250.8125965  | 2517.11638  | 393.9434011 | 3917.242643 |
| 2.9  | 253.0743094  | 2067.393102 | 356.8141571  | 2926.638935 | 540.166919  | 4496.169362 |
| 2.85 | 348.6200168  |             | 482.5436343  | 3393.446296 | 711.8938598 | 5147.597965 |
| 2.8  | 462.3718774  | 2816.098573 | 630.8331558  | 3924.638337 | 912.7407252 | 5879.067732 |
| 2.75 | 597.0383361  |             | 804.8410657  | 4528.036282 | 1146.762058 | 6698.536193 |
| 2.7  | 755.6363894  | 3797.975591 | 1008.079144  | 5212.217084 | 1418.515034 | 7614.304865 |
| 2.65 | 941.5042807  |             | 1244.443645  | 5986.535177 | 1733.162697 | 8634.931814 |
| 2.6  | 1158.308904  | 5077.315145 | 1518.253745  | 6861.131295 | 2096.624751 | 9769.128402 |
| 2.55 | 1410.052323  |             | 1834.302821  | 7846.925161 | 2515.781963 | 11025.62857 |
| 2.5  | 1701.081646  | 6732.454849 | 2197.929485  | 8955.58448  | 2998.734732 | 12413.0129  |
| 2.45 | 2036.114297  |             | 2615.1127    | 10199.46037 | 3555.114407 | 13939.46187 |
| 2.4  | 2420.279437  | 8856.74421  | 3092.590336  | 11591.46004 | 4196.441792 | 15612.41976 |
| 2.35 | 2859.167725  |             | 3638.003513  | 13144.82746 | 4936.530842 | 17438.15175 |
| 2.3  | 3358.878035  | 11558.55253 | 4260.076973  | 14872.78998 | 5791.918952 | 19421.22634 |
| 2.25 | 3926.0599    |             | 4968.861413  | 16788.03433 | 6782.418222 | 21564.10821 |
| 2.2  | 4567.973698  | 14958.03913 | 5776.071067  | 18901.94907 | 7931.928029 | 23867.25225 |
| 2.15 | 5292.598465  |             | 6695.564213  | 21223.54955 | 9269.728231 | 26330.38292 |
| 2.1  | 6108.831277  | 19176.09529 | 7744.022853  | 23757.96168 | 10832.22269 | 28955.34095 |
| 2.05 | 7026.834159  |             | 8941.932205  |             | 12664.89192 | 31750.24294 |
| 2    | 8058.619575  | 24307.47936 | 10314.97686  | 34601.66197 | 14824.40607 | 34734.59069 |
| 1.95 | 9219.000348  |             |              |             |             |             |
| 1.9  | 10527.01795  | 30355.31249 | 13726.55386  | 46266.40256 | 20422.66203 | 41455.1691  |
| 1.85 | 12007.90799  |             |              |             |             |             |
| 1.8  | 13695.61373  | 51808.3082  | 18368.65891  | 61863.50262 | 28420.6344  | 49949.37433 |

TABLE S.6: Results of CCSD(T) calculation for C–RG diatomics

| R, Å | Ar                        |                              | Kr                        |                              | Xe                        |                              |
|------|---------------------------|------------------------------|---------------------------|------------------------------|---------------------------|------------------------------|
|      | $V_{\Pi}, \text{cm}^{-1}$ | $V_{\Sigma}, \text{cm}^{-1}$ | $V_{\Pi}, \text{cm}^{-1}$ | $V_{\Sigma}, \text{cm}^{-1}$ | $V_{\Pi}, \text{cm}^{-1}$ | $V_{\Sigma}, \text{cm}^{-1}$ |
| 25   | -0.001027548              | -0.000972505                 | -0.001468077              | -0.00138565                  | -0.002282851              | -0.002154551                 |
| 22   | -0.002261892              | -0.00210919                  | -0.00325361               | -0.003070329                 | -0.00495855               | -0.004673954                 |
| 20   | -0.004084141              | -0.003869909                 | -0.005827693              | -0.00549478                  | -0.008833474              | -0.008316431                 |
| 17   | -0.010905224              | -0.010214944                 | -0.015717296              | -0.014758502                 | -0.023724667              | -0.022231178                 |
| 15   | -0.02326656               | -0.021862346                 | -0.033637338              | -0.031526027                 | -0.050791946              | -0.047482445                 |
| 12   | -0.091084776              | -0.084999884                 | -0.131379328              | -0.122405416                 | -0.198976812              | -0.184880919                 |
| 10   | -0.279997513              | -0.258994941                 | -0.405996164              | -0.373255891                 | -0.617302437              | -0.566917349                 |
| 9    | -0.540087246              | -0.493429518                 | -0.783848934              | -0.71447737                  | -1.197137201              | -1.089014539                 |
| 8    | -1.134336694              | -1.020986956                 | -1.650620351              | -1.48494296                  | -2.535910467              | -2.274914987                 |
| 7    | -2.667556127              | -2.358352329                 | -3.89721716               | -3.43906693                  | -6.038618827              | -5.323309054                 |

6 -7.2948476 -6.304987212 -10.68013093 -9.228810396 -16.6776865 -14.51810223  
5.5 -12.80475932 -10.99811447 -18.79258956 -16.26323015 -29.24096124 -25.85749162  
5.3 -16.21228919 -13.96556039 -23.76238508 -20.72742475 -36.78476075 -33.10125595  
5.1 -20.61474765 -17.91307147 -30.10542998 -26.66496334 -46.20032367 -42.75701396  
5 -23.26166258 -20.36193374 -33.87592412 -30.34952293 -51.66847545 -48.75312859  
4.8 -29.58250157 -26.49810653 -42.73553749 -39.58036062 -64.0815688 -63.77756672  
4.6 -37.37331755 -34.79484422 -53.31746989 -52.03572938 -77.91418274 -84.0323971  
4.5 -41.79215768 -39.98956149 -59.1072419 -59.81237737 -84.8627857 -96.65600036  
4.45 -44.10843653 -42.89778595 -62.06488846 -64.1576805 -88.1832222 -103.7001746  
4.4 -46.47831769 -46.03431882 -65.04856042 -68.83696296 -91.29944349 -111.2677418  
4.35 -48.88258976 -49.41595747 -67.94840446 -73.87330743 -94.15277495 -119.4238257  
4.3 -51.29636872 -53.06011248 -70.78568671 -79.29053742 -96.60675241 -128.1748851  
4.25 -53.68744915 -56.98494632 -73.47489173 -85.11293394 -98.54292851 -137.5677592  
4.2 -56.01493538 -61.20848245 -75.94076229 -91.36494448 -99.80773172 -147.6396647  
4.15 -58.22734097 -65.74897056 -78.09040136 -98.07074806 -100.2182623 -158.42769  
4.1 -60.26023819 -70.62413906 -79.81154416 -105.2536745 -99.55777116 -169.9683265  
4.05 -62.03401058 -75.8502755 -80.96761577 -112.9354835 -97.5703638 -182.2967267  
4 -63.45060276 -81.44232848 -81.39418245 -121.1355257 -93.95522737 -195.4459643  
3.95 -64.39033244 -87.41230356 -80.89389089 -129.8696624 -88.35905623 -209.4461882  
3.9 -64.70764593 -93.76924882 -79.2309126 -139.1492074 -80.36948159 -224.3235847  
3.85 -64.22663589 -100.5171265 -76.12460784 -148.9796523 -69.50559197 -240.0991131  
3.8 -62.73548892 -107.6542287 -71.24230789 -159.3591007 -55.20869517 -256.7878996  
3.75 -59.97946811 -115.1713171 -64.19058671 -170.2766898 -36.8310251 -274.3980858  
3.7 -55.65635161 -123.0498902 -54.50633024 -181.7103302 -13.62384973 -292.9283051  
3.6 -40.79391204 -139.7564003 -24.96986608 -205.9668173 50.86655359 -332.6879625  
3.5 -14.37301011 -157.3438771 22.93601852 -231.6208021 146.8739793 -375.7732758  
3.4 28.86124877 -175.0487066 96.80275525 -257.7635777 285.8013183 -421.4872652  
3.35 58.95561763 -183.5779643 146.5584466 -270.5791838 375.8879882 -444.945821  
3.3 96.1693584 -191.6145229 206.9181553 -282.8938108 482.6725796 -468.4990219  
3.25 141.8433694 -198.8824344 279.7352018 -294.3825691 608.7555298 -491.8405026  
3.2 197.5491773 -205.0359339 367.1544519 -304.6448469 757.086085 -514.5950586  
3.15 265.1264114 -209.6479913 471.6527652 -313.1941901 930.9937286 -536.3133481  
3.1 346.7220268 -212.196251 596.0820593 -319.4458471 1134.221004 -556.4643691  
3.05 444.8351082 -212.049856 743.716756 -322.7039013 1370.961289 -574.4203992  
3 562.3663753 -208.4554537 918.3074365 -322.1454377 1645.905413 -589.4277668  
2.95 702.6714919 -200.5232592 1124.140939 -316.8005979 1964.297648 -600.5607138  
2.9 869.6250265 -187.2063635 1366.108148 -305.5269436 2331.996195 -606.6606394  
2.85 1067.692485 -167.2769533 1649.781579 -286.976364 2755.529845 -606.2643041  
2.8 1302.017311 -139.2939546 1981.499559 -259.5559532 3242.143124 -597.527127  
2.75 1578.516412 -101.5652027 2368.456244 -221.3800347 3799.824326 -578.1366541  
2.7 1903.987433 -52.10622876 2818.790662 -170.2204517 4437.311553 -545.2133781  
2.65 2286.219782 11.40168422 3341.674873 -103.4494381 5164.072997 -495.1964147  
2.6 2734.11121 91.65478547 3947.397946 -17.96902045 5990.260888 -423.7013423  
2.55 3257.790959 191.7745171 4647.446586 89.87209092 6926.647773 -325.3314967  
2.5 3868.743461 315.3619225 5454.57984 224.3931604 7984.560139 -193.4152254  
2.45 4579.933137 466.5592445 6382.893755 390.7171534 9175.821515 -19.64556236

|      |             |             |             |             |             |             |
|------|-------------|-------------|-------------|-------------|-------------|-------------|
| 2.4  | 5405.922289 | 650.1205768 | 7447.871551 | 594.951808  | 10512.6977  | 206.380932  |
| 2.35 | 6362.972798 | 871.4968436 | 8666.410557 | 844.415775  | 12007.81414 | 497.7041527 |
| 2.3  | 7469.126442 | 1136.936654 | 10056.80853 | 1147.91822  | 13674.03124 | 870.5959348 |
| 2.25 | 8744.241342 | 1453.613352 | 11638.67975 | 1516.093405 | 15524.24763 | 1345.20026  |
| 2.2  | 10209.99246 | 1829.792008 | 13432.7635  | 1961.794825 | 17571.30753 | 1946.273401 |
| 2.15 | 11889.77836 | 2275.037576 | 15460.58636 | 2500.562134 | 19828.01258 | 2704.033464 |
| 2.1  | 13808.48359 | 2800.469778 | 17743.93726 | 3151.189957 | 22307.7449  | 3655.357196 |
| 2.05 | 15992.03653 | 3419.061852 | 20304.10809 | 3936.444842 | 25026.10808 | 4845.402898 |
| 2    | 18466.64475 | 4146.011289 | 23160.86629 | 4884.010374 | 28004.38993 | 6330.035018 |
| 1.95 | 21257.61153 | 4999.236189 | 26331.16864 | 6027.788567 | 31274.96693 | 8178.860261 |
| 1.9  | 24387.59051 | 6000.097311 | 29827.75178 | 7409.699903 | 34888.50538 | 10479.00893 |
| 1.85 | 27874.059   | 7174.456648 | 33658.04555 | 9082.129763 | 38922.73346 | 13339.72333 |
| 1.8  | 31725.78041 | 8554.207595 | 37824.76185 | 11111.22112 | 43493.77779 | 16898.13897 |

TABLE S.7: Results of CCSD(T) calculation for N–RG diatomics

| R, Å | Ar                       | Kr           | Xe           |
|------|--------------------------|--------------|--------------|
|      | Energy, cm <sup>-1</sup> |              |              |
| 25   | -0.000694497             | -0.001036543 | -0.001624871 |
| 22   | -0.001650284             | -0.002321102 | -0.003530894 |
| 20   | -0.002920085             | -0.004166206 | -0.00628252  |
| 17   | -0.007862079             | -0.011220821 | -0.016793412 |
| 15   | -0.016867355             | -0.024006718 | -0.035861965 |
| 12   | -0.065515504             | -0.093400152 | -0.139842274 |
| 10   | -0.19978228              | -0.285679553 | -0.429765794 |
| 9    | -0.382372313             | -0.547886497 | -0.827630142 |
| 8    | -0.794909643             | -1.142254726 | -1.735269256 |
| 7    | -1.842783354             | -2.657490255 | -4.071548699 |
| 6    | -4.956824381             | -7.168599822 | -11.11443498 |
| 5.5  | -8.674610003             | -12.61458625 | -19.61093443 |
| 5.3  | -11.00964702             | -16.02777285 | -24.88837294 |
| 5.2  | -12.44270376             | -18.11253746 | -28.08528737 |
| 5.1  | -14.08965115             | -20.49847825 | -31.71433051 |
| 5    | -15.98149123             | -23.22680385 | -35.82050154 |
| 4.9  | -18.15231215             | -26.34141451 | -40.44595282 |
| 4.8  | -20.63999523             | -29.88759218 | -45.62635847 |
| 4.7  | -23.48635704             | -33.90937737 | -51.38428318 |
| 4.6  | -26.7361116              | -38.44502086 | -57.71702075 |
| 4.5  | -30.43165509             | -43.51907267 | -64.57697976 |
| 4.4  | -34.60494324             | -49.13019303 | -71.84470654 |
| 4.3  | -39.26738129             | -55.2335379  | -79.28311386 |
| 4.2  | -44.3959214              | -61.71422911 | -86.53966886 |
| 4.1  | -49.91213261             | -68.35024588 | -92.98252766 |
| 4    | -55.64989012             | -74.75862061 | -97.71138176 |
| 3.9  | -61.30770829             | -80.31936089 | -99.38394919 |

|      |              |              |              |
|------|--------------|--------------|--------------|
| 3.8  | -66.37879298 | -84.06844835 | -96.04969509 |
| 3.75 | -68.455313   | -84.83241378 | -91.67096712 |
| 3.7  | -70.0478065  | -84.54727631 | -84.90675137 |
| 3.65 | -70.98153505 | -82.91886589 | -75.22139542 |
| 3.6  | -71.04061145 | -79.59137685 | -61.98119842 |
| 3.55 | -69.96055782 | -74.13595937 | -44.44024814 |
| 3.5  | -67.41809657 | -66.03738438 | -21.72371977 |
| 3.45 | -63.02109854 | -54.6786837  | 7.191007855  |
| 3.4  | -56.29508717 | -39.32322217 | 43.49655406  |
| 3.35 | -46.6673951  | -19.09393447 | 88.58203886  |
| 3.3  | -33.44832816 | 7.050993367  | 144.0643278  |
| 3.25 | -15.80878678 | 40.34649384  | 211.8234227  |
| 3.2  | 7.246499842  | 82.25366008  | 294.0434715  |
| 3.15 | 36.91079133  | 134.4978671  | 393.2542201  |
| 3.1  | 74.61010383  | 199.1122048  | 512.376231   |
| 3    | 181.2466098  | 375.4232093  | 824.2903321  |
| 2.9  | 345.0016146  | 635.6308816  | 1262.861742  |
| 2.8  | 590.8900264  | 1012.949391  | 1870.693504  |
| 2.7  | 953.6126383  | 1552.043002  | 2701.82554   |
| 2.6  | 1480.835903  | 2312.40517   | 3824.086673  |
| 2.5  | 2237.516196  | 3372.518888  | 5321.408673  |
| 2.4  | 3311.360513  | 4834.498492  | 7295.030105  |
| 2.2  | 6913.319471  | 9517.884875  | 13163.09963  |
| 2    | 13684.16611  | 17811.71458  | 22636.25806  |
| 1.8  | 24868.96258  | 30711.77260  | 61452.36640  |

TABLE S.8: Results of CCSD(T) calculation for F–RG diatomics

| R, Å | Ar                        |                              | Kr                        |                              | Xe                        |                              |
|------|---------------------------|------------------------------|---------------------------|------------------------------|---------------------------|------------------------------|
|      | $V_{\Pi}, \text{cm}^{-1}$ | $V_{\Sigma}, \text{cm}^{-1}$ | $V_{\Pi}, \text{cm}^{-1}$ | $V_{\Sigma}, \text{cm}^{-1}$ | $V_{\Pi}, \text{cm}^{-1}$ | $V_{\Sigma}, \text{cm}^{-1}$ |
| 25   | -0.000506488              | -0.000467614                 | -0.000633254              | -0.000611521                 | -0.00101733               | -0.000978082                 |
| 22   | -0.001132169              | -0.001050054                 | -0.001440792              | -0.001392936                 | -0.002194948              | -0.002118958                 |
| 20   | -0.001925997              | -0.001812518                 | -0.002597376              | -0.002510982                 | -0.003899401              | -0.003766198                 |
| 17   | -0.005062734              | -0.004901399                 | -0.007028204              | -0.006788608                 | -0.010422215              | -0.010057663                 |
| 15   | -0.010735629              | -0.010397314                 | -0.015060277              | -0.014529399                 | -0.02226964               | -0.02146154                  |
| 12   | -0.04170448               | -0.040145592                 | -0.058640276              | -0.0563958                   | -0.086776235              | -0.083347666                 |
| 10   | -0.126940928              | -0.121867963                 | -0.179385652              | -0.171662166                 | -0.266551977              | -0.25502494                  |
| 9    | -0.243052933              | -0.231813286                 | -0.344022621              | -0.328060377                 | -0.513466285              | -0.489194035                 |
| 8    | -0.505655568              | -0.488759719                 | -0.717432275              | -0.680414424                 | -1.077111784              | -1.019543357                 |
| 7    | -1.17155302               | -1.101505747                 | -1.668750645              | -1.570044696                 | -2.527030198              | -2.375188395                 |
| 6    | -3.145167321              | -2.927006056                 | -4.500337384              | -4.189854317                 | -6.898213579              | -6.439115845                 |
| 5.5  | -5.51588131               | -5.100392781                 | -7.931082917              | -7.361069652                 | -12.19082                 | -11.43297421                 |
| 5.3  | -7.009335908              | -6.470946179                 | -10.09243929              | -9.376114965                 | -15.48966129              | -14.62982535                 |
| 5.2  | -7.928619056              | -7.317600187                 | -11.41759491              | -10.62200404                 | -17.49327764              | -16.61176149                 |
| 5.1  | -8.988765751              | -8.297700145                 | -12.93901745              | -12.06439159                 | -19.77202631              | -18.90916593                 |

5 -10.21225356 -9.435190968 -14.68520986 -13.73801172 -22.35566423 -21.57651025  
4.9 -11.62414074 -10.75751034 -16.68693278 -15.68387643 -25.27095168 -24.67755704  
4.8 -13.25165105 -12.29720465 -18.97598028 -17.94989228 -28.53821247 -28.28669502  
4.7 -15.12435899 -14.09273496 -21.58430064 -20.59207281 -32.16539321 -32.49060357  
4.6 -17.27406132 -16.1903112 -24.53913878 -23.67622914 -36.14073599 -37.39011222  
4.5 -19.73441263 -18.64687963 -27.86037521 -27.27817881 -40.41735996 -43.10104307  
4.4 -22.53732037 -21.52983163 -31.55098721 -31.48515876 -44.89382704 -49.75478445  
4.3 -25.70579936 -24.91652214 -35.58582411 -36.39597988 -49.38466405 -57.49646107  
4.2 -29.24265347 -28.89211292 -39.89166 -42.11924308 -53.5659471 -66.47256908  
4.1 -33.11424941 -33.5469743 -44.3171525 -48.7686331 -56.96375378 -76.87666952  
4 -37.22763803 -38.97348754 -48.58734403 -56.45379226 -58.76808729 -88.84328172  
3.9 -41.3952323 -45.25997098 -52.24194778 -65.26712765 -57.81365124 -102.5430125  
3.8 -45.28354883 -52.47905567 -54.52371359 -75.26541054 -52.36355647 -118.1241307  
3.7 -48.33045871 -60.66602493 -54.28514733 -86.44307334 -39.88629007 -135.7114716  
3.6 -49.62323889 -69.78080189 -49.75979031 -98.69546345 -16.72561425 -155.3895125  
3.5 -47.71724279 -79.65058399 -38.30689869 -111.7503256 22.36399643 -177.1692606  
3.4 -40.38088833 -89.89141883 -28.82273578 -118.427231 84.86140637 -200.9609775  
3.35 -33.67616684 -94.9452971 -16.00940426 -125.0765779 128.0442342  
3.3 -24.22588792 -99.78864003 0.916170202 -131.5651065 181.3473783 -226.5666055  
3.25 -11.3355339 -104.2487227 22.90192007 -137.7260697 246.7642231  
3.2 5.844253753 -108.102578 51.09232331 -143.3413473 326.6428576 -253.7541958  
3.15 28.34956942 -111.0656051 86.86598585 -148.139762 423.7424657  
3.1 57.4416152 -112.7787445 131.8792346 -151.7863579 541.2995123 -282.4490814  
3.05 94.6521321 -112.7929431 188.1173606 -153.8721424 683.106461  
3 141.8371419 -110.5509211 257.955177 -153.9020703 853.6039786 -312.9860382  
2.95 201.2420374 -105.3647535 344.2288639 -151.280387 1057.984045 -329.2079167  
2.9 275.5801506 -96.38808968 450.3212361 -145.1619841 1302.305494 -346.2907696  
2.85 368.1269382 -82.58191414 580.2627853 -135.101895 -364.4514954  
2.8 482.8325575 -62.67393567 931.7854234 -97.80247193 1940.107637 -383.9315519  
2.75 -404.964998  
2.7 798.7198534 1.986819518 1449.000791 -28.75535419 2837.806718 -427.7045099  
2.65 -452.1200471  
2.6 1274.038338 114.4072121 2202.267793 86.99136843 4088.730441 -477.7996789  
2.55 1981.787505 299.0591678 3289.333147 270.6519336 5812.828576 -503.645656  
2.5 -527.5109847  
2.48 -535.6846662  
2.46 -542.6052924  
2.44 -547.858894  
2.42 -550.9601198  
2.4 3026.15092 591.2525441 4844.66527 553.3543969 8159.065751 -551.3405893  
2.35 -535.8204901  
2.3 4554.666033 1041.85421 7051.043338 983.3954182 11301.54368 -485.7779052  
2.25 -383.5749442  
2.2 6774.441229 1724.773315 10152.46856 1639.987097 15418.90064 -206.4118314  
2.15 74.60782946  
2.1 9972.741845 2749.179082 14465.06109 2656.945076 20646.17596 497.3639691

|      |             |             |             |             |             |             |
|------|-------------|-------------|-------------|-------------|-------------|-------------|
| 2.05 |             |             |             |             |             | 1120.573424 |
| 2    | 14540.37124 | 4279.682904 | 20378.64004 | 4258.748299 | 27027.87608 | 2051.564691 |
| 1.9  | 20992.25284 | 6569.031729 | 28334.44084 | 6809.522345 | 34611.50614 | 5268.657287 |
| 1.8  | 29969.84152 | 10005.40007 | 38763.19281 | 10887.76338 | 43526.96896 | 10848.64397 |

TABLE S.9: Results of CCSD(T) calculation for Ne–RG diatomics

| R, Å | Ar                       | Kr           | Xe           |
|------|--------------------------|--------------|--------------|
|      | Energy, cm <sup>-1</sup> |              |              |
| 25   | -0.000365238             | -0.000490207 | -0.000748941 |
| 22   | -0.000820376             | -0.001094692 | -0.001709793 |
| 20   | -0.001464197             | -0.002009634 | -0.003011856 |
| 17   | -0.003884056             | -0.005450566 | -0.008068751 |
| 15   | -0.008370962             | -0.011693338 | -0.017220854 |
| 12   | -0.032480879             | -0.045472612 | -0.066937246 |
| 10   | -0.098733197             | -0.138620517 | -0.204960364 |
| 9    | -0.188445148             | -0.265164082 | -0.393585811 |
| 8    | -0.390180173             | -0.550783215 | -0.821966853 |
| 7    | -0.897330728             | -1.273760733 | -1.917103475 |
| 6    | -2.392831014             | -3.405431613 | -5.191070688 |
| 5.5  | -4.1746992               | -5.977645161 | -9.15346516  |
| 5.3  | -5.295991813             | -7.599260148 | -11.63398769 |
| 5.2  | -5.98740332              | -8.596131149 | -13.14731815 |
| 5.1  | -6.785888969             | -9.743558595 | -14.87605056 |
| 5    | -7.709560465             | -11.06518424 | -16.84712759 |
| 4.9  | -8.779330157             | -12.58750007 | -19.08883038 |
| 4.8  | -10.01993092             | -14.33904642 | -21.6230363  |
| 4.7  | -11.45470577             | -16.35167922 | -24.46883879 |
| 4.6  | -13.11449533             | -18.65394157 | -27.63696074 |
| 4.5  | -15.03073923             | -21.2752353  | -31.11434027 |
| 4.4  | -17.24167121             | -24.23575741 | -34.85622063 |
| 4.3  | -19.78058293             | -27.54581678 | -38.76424666 |
| 4.2  | -22.67612944             | -31.18661787 | -42.64619462 |
| 4.1  | -25.94255087             | -35.09603217 | -46.22155296 |
| 4    | -29.55894403             | -39.13958383 | -48.95751966 |
| 3.9  | -33.45736549             | -43.05858557 | -50.07728359 |
| 3.8  | -37.48150192             | -46.4109614  | -48.37976076 |
| 3.7  | -41.33477604             | -48.47031694 | -42.06508323 |
| 3.6  | -44.49472124             | -48.08891546 | -28.47434569 |
| 3.5  | -46.0857321              | -43.49219246 | -3.716287516 |
| 3.4  | -44.70121115             | -31.97218737 | 37.87267363  |
| 3.3  | -38.12811396             | -9.431007707 | 104.4972694  |
| 3.2  | -22.93405292             | 7.790345039  | 207.9667597  |
| 3.1  | 6.178925521              | 30.28325629  | 365.1377457  |
| 3    | 57.3219723               | 59.29608774  | 599.8723532  |

|     |             |             |             |
|-----|-------------|-------------|-------------|
| 2.9 | 142.7827381 | 96.34641415 | 945.7465158 |
| 2.8 | 280.9955838 | 143.2746488 | 1449.843352 |
| 2.7 | 499.4624004 | 202.3080269 | 2177.945485 |
| 2.6 | 839.088736  | 368.0083516 | 3221.349367 |
| 2.5 | 1360.444482 | 622.3237807 | 4705.5756   |
| 2.4 | 2152.703382 | 1007.121368 | 6801.747749 |
| 2.3 | 3346.442675 | 1582.875416 | 9741.84713  |
| 2.2 | 5131.841862 | 2436.462938 | 13837.76378 |
| 2.1 | 7784.268898 | 3691.931133 | 19502.60364 |
| 2   | 11699.61265 | 5525.431899 | 27273.761   |
| 1.9 | 17441.13482 | 8185.756122 | 37838.72839 |
| 1.8 | 25797.61467 | 12021.67478 | 52067.41927 |

---

---

## II. POTENTIALS. COMPARISON TO PREVIOUS *AB INITIO* AND EXPERIMENTAL DATA

Table S.10 compares the equilibrium parameters of the present *ab initio* potentials with the selected literature results. Avoiding the complete coverage of the literature, which for some atoms is enormous, we tried to pick up the most recent and accurate *ab initio* data of the CCSD(T) level, empirical fits to experimental data and results of the Tang-Toennies (TT) model. References to earlier works can be retrieved from the citations provided. At least for half of the atoms (H, He, Li, O, Ne) literature data certify reasonably good quality of our interaction potentials. The  $V_{\Sigma}$  B-RG and F-RG potentials show large disagreement with available data. The latter case was elaborated by Hoffman and Colletto<sup>101</sup>, who showed that the single-reference coupled-cluster approach is insufficient neglecting the coupling between the covalent and ionic  $^2\Sigma$  states. Much better agreement with experimental data was achieved by using the multireference methods that accounts for strong spin-orbit coupling. The case of B-RG may deserve additional study. Little or no data exist to support our results for interactions involving Be, C and N atoms.

Overall, we believe that the present potentials are good enough to represent the trends in interaction range and energy across the first- and second-row atoms. It is not certainly true for atomic F, but we are considering this case as a hypothetical system rather than a model for real atom.



TABLE S.10. Equilibrium parameters  $R_e$  (Å) and  $D_e$  (cm<sup>-1</sup>) of A-RG interaction potentials.

| Atom                   | Potential               | Source                  | Ar    |       | Kr    |       | Xe    |       |
|------------------------|-------------------------|-------------------------|-------|-------|-------|-------|-------|-------|
|                        |                         |                         | $R_e$ | $D_e$ | $R_e$ | $D_e$ | $R_e$ | $D_e$ |
| H                      | $V_\Sigma$              | present                 | 3.60  | 34    | 3.68  | 42    | 3.81  | 52    |
|                        |                         | CCSD(T) Ref. 86         | 3.65  | 28    | 3.75  | 35    | 3.90  | 42    |
|                        |                         | TT Ref. 87              | 3.55  | 38    | 3.65  | 47    | 3.81  | 50    |
| He                     | $V_\Sigma$              | present                 | 3.49  | 21    | 3.70  | 21    | 4.00  | 20    |
|                        |                         | CCSD(T) Refs. 88,89     |       |       | 3.71  | 21    | 3.97  | 20    |
|                        |                         | TT Ref. 90              | 3.50  | 21    | 3.69  | 21    | 3.97  | 20    |
|                        |                         | empirical <sup>a</sup>  | 3.48  | 21    | 3.69  | 21    | 3.98  | 20    |
| Li                     | $V_\Sigma$              | present                 | 4.89  | 41    | 4.84  | 65    | 4.87  | 98    |
|                        |                         | CCSD(T) Ref. 83         | 4.91  | 41    | 4.82  | 66    | 4.85  | 99    |
|                        |                         | empirical <sup>b</sup>  | 4.89  | 42    | 4.78  | 68    | 4.80  | 102   |
| Be                     | $V_\Sigma$              | present                 | 4.23  | 67    | 4.29  | 92    | 4.39  | 124   |
| B                      | $V_\Sigma$              | present                 | 3.94  | 75    | 4.00  | 102   | 4.10  | 138   |
|                        |                         | CCSD(T) Ref. 115        | 4.43  | 45    | 4.50  | 60    | 4.70  | 68    |
|                        |                         | CCSD(T) <sup>c</sup>    | 4.38  | 50    | 4.47  | 65    | 4.59  | 86    |
|                        | $V_{\text{II}}$         | present                 | 3.57  | 126   | 3.60  | 173   | 3.65  | 243   |
|                        |                         | CCSD(T) Ref. 115        | 3.62  | 110   | 3.67  | 147   | 3.73  | 197   |
|                        |                         | CCSD(T) <sup>c</sup>    | 3.57  | 124   | 3.61  | 170   | 3.66  | 238   |
| $V_0$                  | present                 | 4.37                    | 52    | 4.42  | 71    | 4.55  | 92    |       |
| C                      | $V_\Sigma$              | present, Ref. 56        | 3.07  | 212   | 3.04  | 323   | 2.88  | 607   |
|                        |                         | CCSD(T) Ref. 95         | 3.21  | 150   |       |       |       |       |
|                        | $V_{\text{II}}$         | present, Ref. 56        | 3.93  | 65    | 4.00  | 81    | 4.15  | 100   |
|                        | $V_0$                   | present, Ref. 56        | 3.73  | 78    | 3.81  | 101   | 3.94  | 129   |
| N                      | $V_\Sigma$              | present                 | 3.62  | 71    | 3.73  | 85    | 3.92  | 99    |
| O                      | $V_\Sigma$              | present, Refs. 35,96,97 | 3.78  | 49    | 3.92  | 58    | 4.13  | 66    |
|                        |                         | CCSD(T) Refs. 98,99     | 3.81  | 46    | 3.94  | 54    | 4.16  | 58    |
|                        |                         | empirical <sup>d</sup>  | 3.85  | 41    | 4.05  | 45    | 4.24  | 56    |
|                        | $V_{\text{II}}$         | present, Refs. 35,96,97 | 3.36  | 88    | 3.44  | 106   | 3.57  | 130   |
|                        |                         | CCSD(T) Refs. 98,99     | 3.36  | 83    | 3.41  | 100   | 3.68  | 105   |
|                        |                         | empirical <sup>d</sup>  | 3.45  | 84    | 3.57  | 106   | 3.69  | 140   |
| $V_0$                  | present, Refs. 35,96,97 | 3.55                    | 65    | 3.65  | 78    | 3.84  | 91    |       |
|                        | empirical <sup>d</sup>  | 3.60                    | 63    | 3.75  | 75    | 3.90  | 95    |       |
| F                      | $V_\Sigma$              | present                 | 3.07  | 113   | 3.07  | 154   | 2.45  | 551   |
|                        |                         | CCSD(T) Ref. 101        | 3.22  | 72    | 3.14  | 127   | 2.39  | 524   |
|                        |                         | empirical <sup>e</sup>  | 3.12  | 97    | 2.83  | 381   | 2.31  | 1305  |
|                        | $V_{\text{II}}$         | present                 | 3.60  | 50    | 3.76  | 55    | 3.97  | 59    |
|                        |                         | empirical <sup>e</sup>  | 3.61  | 47    | 3.85  | 46    | 3.93  | 55    |
|                        | $V_0$                   | present                 | 3.47  | 58    | 3.62  | 66    | 3.81  | 74    |
| empirical <sup>e</sup> |                         | 3.50                    | 55    | 3.65  | 58    | 3.78  | 65    |       |
| Ne                     | $V_\Sigma$              | present                 | 3.47  | 46    | 3.62  | 49    | 3.81  | 50    |
|                        |                         | CCSD(T) Refs. 81,89     | 3.49  | 46    |       |       | 3.89  | 51    |
|                        |                         | TT Ref. 90              | 3.48  | 46    | 3.65  | 49    | 3.89  | 49    |
|                        |                         | empirical <sup>f</sup>  | 3.49  | 47    | 3.63  | 50    | 3.86  | 50    |

<sup>a</sup> Fits to differential cross section and diffusion coefficients<sup>91</sup>.

<sup>b</sup> Spectroscopy for Li-Ar<sup>92</sup>, fits to differential cross sections for Li-Kr,Xe<sup>93</sup>.

<sup>c</sup> Most accurate results from Ref. 94 are quoted.

<sup>d</sup> Fits to scattering cross sections<sup>100</sup>.

<sup>e</sup> Fits to scattering cross sections<sup>102</sup>.

<sup>f</sup> Fits to scattering cross sections and second virial coefficients<sup>103</sup>.

### III. TABULATED CONVEX HULLS AND FORMATION ENERGIES OF DIFFERENT VARIANTS OF IS SITE. ISOFTROPIC MODEL

TABLE S.10. Lowest energy trapping site formation energies (in  $\text{cm}^{-1}$ ), obtained within the isotropic model for all atoms in Ar crystal

| N deleted | Formation energy, $\text{cm}^{-1}$ |      |      |      |      |      |
|-----------|------------------------------------|------|------|------|------|------|
|           | 0                                  | 1    | 2    | 3    | 4    | 5    |
| H         | 791                                | 151  | 736  | 1241 | 1685 | 2103 |
| He        | 704                                | 368  | 940  | 1429 | 1858 | 2274 |
| Li        | 2937                               | 806  | 1184 | 1186 | 990  | 1465 |
| Be        | 2004                               | -214 | 352  | 786  | 804  | 1316 |
| B         | 1820                               | -595 | 31   | 569  | 977  | 1466 |
| C         | 1390                               | -606 | 28   | 581  | 1055 | 1466 |
| N         | 1173                               | -407 | 213  | 759  | 1256 | 1691 |
| O         | 986                                | -272 | 331  | 856  | 1315 | 1730 |
| F         | 839                                | -118 | 480  | 994  | 1456 | 1865 |
| Ne        | 903                                | 45   | 634  | 1140 | 1600 | 2028 |

TABLE S.11. Lowest energy trapping site formation energies (in  $\text{cm}^{-1}$ ), obtained within the isotropic model for all atoms in Kr crystal

| N deleted | Formation energy, $\text{cm}^{-1}$ |      |      |      |      |      |
|-----------|------------------------------------|------|------|------|------|------|
|           | 0                                  | 1    | 2    | 3    | 4    | 5    |
| H         | 607                                | 392  | 1227 | 1943 | 2607 | 3195 |
| He        | 784                                | 665  | 1484 | 2185 | 2848 | 3398 |
| Li        | 2471                               | 86   | 851  | 1316 | 1394 | 2114 |
| Be        | 2736                               | -552 | 333  | 1084 | 1578 | 2291 |
| B         | 1814                               | -725 | 205  | 996  | 1677 | 2269 |
| C         | 1285                               | -518 | 374  | 1147 | 1819 | 2414 |
| N         | 1146                               | -203 | 667  | 1416 | 2085 | 2680 |
| O         | 903                                | -31  | 816  | 1545 | 2209 | 2781 |
| F         | 812                                | 165  | 1008 | 1730 | 2395 | 2963 |
| Ne        | 1003                               | 346  | 1182 | 1897 | 2526 | 3147 |

TABLE S.12. Lowest energy trapping site formation energies (in  $\text{cm}^{-1}$ ), obtained within the isotropic model for all atoms in Xe crystal

| N deleted | Formation energy, $\text{cm}^{-1}$ |      |      |      |      |      |
|-----------|------------------------------------|------|------|------|------|------|
|           | 0                                  | 1    | 2    | 3    | 4    | 5    |
| H         | 351                                | 747  | 1914 | 2911 | 3867 | 4703 |
| He        | 893                                | 1065 | 2219 | 3205 | 4141 | 4923 |
| Li        | 1934                               | -420 | 780  | 1772 | 2256 | 3270 |
| Be        | 2740                               | -703 | 563  | 1660 | 2603 | 3457 |
| B         | 1450                               | -659 | 598  | 1684 | 2636 | 3504 |
| C         | 936                                | -260 | 965  | 2013 | 2958 | 3786 |
| N         | 1033                               | 158  | 1357 | 2382 | 3284 | 4129 |
| O         | 721                                | 356  | 1529 | 2520 | 3459 | 4244 |
| F         | 687                                | 579  | 1749 | 2748 | 3685 | 4467 |
| Ne        | 1092                               | 757  | 1925 | 2921 | 3859 | 4639 |

TABLE S.13. Formation energies (in  $\text{cm}^{-1}$ ) of different variants of IS trapping site within the isotropic approximation. In Xe crystal, all atoms have  $\text{IS}(O_h)$  site as the most stable

| Atom | $\text{IS}(O_h)$ |      | $\text{IS}(\text{DB})$ |      | $\text{IS}(\text{SI})$ |    |
|------|------------------|------|------------------------|------|------------------------|----|
|      | Ar               | Kr   | Ar                     | Kr   | Ar                     | Kr |
| Li   | 3160             | 2471 | 2937                   |      |                        |    |
| Be   | 2765             | 2795 |                        | 2736 | 2004                   |    |
| B    | 1940             | 1867 |                        | 1814 | 1820                   |    |
| C    | 1395             | 1285 | 1390                   |      |                        |    |

#### IV. TABULATED CONVEX HULLS AND FORMATION ENERGIES OF DIFFERENT VARIANTS OF IS SITE. NR DIM MODEL

TABLE S.14. Lowest energy trapping site formation energies (in  $\text{cm}^{-1}$ ), obtained within the NR DIM model for all atoms in Ar crystal

| N deleted | Formation energy, $\text{cm}^{-1}$ |      |      |     |      |      |
|-----------|------------------------------------|------|------|-----|------|------|
|           | 0                                  | 1    | 2    | 3   | 4    | 5    |
| B         | 1358                               | -674 | -147 | 338 | 820  | 1220 |
| C         | 523                                | -635 | -19  | 502 | 978  | 1423 |
| O         | 834                                | -274 | 327  | 849 | 1314 | 1728 |
| F         | 656                                | -119 | 475  | 983 | 1456 | 1851 |

TABLE S.15. Lowest energy trapping site formation energies (in  $\text{cm}^{-1}$ ), obtained within the NR DIM model for all atoms in Kr crystal

| N deleted | Formation energy, $\text{cm}^{-1}$ |      |     |      |      |      |
|-----------|------------------------------------|------|-----|------|------|------|
|           | 0                                  | 1    | 2   | 3    | 4    | 5    |
| B         | 1220                               | -776 | 64  | 816  | 1480 | 2106 |
| C         | 78                                 | -533 | 344 | 1023 | 1705 | 2338 |
| O         | 714                                | -28  | 817 | 1544 | 2198 | 2828 |
| F         | 501                                | 163  | 990 | 1706 | 2370 | 2932 |

TABLE S.16. Lowest energy trapping site formation energies (in  $\text{cm}^{-1}$ ), obtained within the NR DIM model for all atoms in Xe crystal

| N deleted | Formation energy, $\text{cm}^{-1}$ |      |      |      |      |      |
|-----------|------------------------------------|------|------|------|------|------|
|           | 0                                  | 1    | 2    | 3    | 4    | 5    |
| B         | 730                                | -687 | 531  | 1603 | 2558 | 3409 |
| C         | -1121                              | -369 | 802  | 1561 | 2525 | 3301 |
| O         | 474                                | 353  | 1518 | 2516 | 3459 | 4249 |
| F         | -1428                              | -140 | 988  | 1929 | 2831 | 3628 |

TABLE S.17. Formation energies (in  $\text{cm}^{-1}$ ) of different variants of IS trapping site within the NR DIM model. For O@RG IS( $D_{2h}$ ) site is unstable.

| Atom | IS( $O_h$ ) |      |      | IS( $D_{2h}$ ) |      |       |
|------|-------------|------|------|----------------|------|-------|
|      | Ar          | Kr   | Xe   | Ar             | Kr   | Xe    |
| B    | 1485        | 1220 | 730  | 1358           | 1230 | 937   |
| C    | 952         | 628  | -212 | 514            | 73   | -1124 |
| O    | 834         | 714  | 473  |                |      |       |
| F    | 652         | 512  | -178 | 660            | 500  | -1429 |

## V. STRUCTURE OF STABLE TRAPPING SITES. ISOTROPIC MODEL

TABLE S.18. Minimum O–RG distances ( $\text{\AA}$ ) in the  $IS(O_h)$  site optimized using the isotropic model in comparison with the equivalent distances in the ideal lattice. The number of equivalent RG atoms is given in parentheses.

| RG       | crystal | isotropic |
|----------|---------|-----------|
| H@RG     |         |           |
| Ar       | 2.66(6) | 2.93(6)   |
| Kr       | 2.84(6) | 3.03(6)   |
| Xe       | 3.07(6) | 3.19(6)   |
| He@RG    |         |           |
| Ar       | 2.66(6) | 2.89(6)   |
| Kr       | 2.84(6) | 3.03(6)   |
| Xe       | 3.07(6) | 3.22(6)   |
| Li@RG    |         |           |
| Ar       | 2.66(6) | 3.26(6)   |
| Kr       | 2.84(6) | 3.22(6)   |
| Xe       | 3.07(6) | 3.37(6)   |
| Be@RG    |         |           |
| Ar       | 2.66(6) | 3.44(6)   |
| Kr       | 2.84(6) | 3.49(6)   |
| Xe       | 3.07(6) | 3.60(6)   |
| B@RG iso |         |           |
| Ar       | 2.66(6) | 3.31(6)   |
| Kr       | 2.84(6) | 3.37(6)   |
| Xe       | 3.07(6) | 3.47(6)   |
| C@RG iso |         |           |
| Ar       | 2.66(6) | 3.20(6)   |
| Kr       | 2.84(6) | 3.27(6)   |
| Xe       | 3.07(6) | 3.39(6)   |
| N@RG     |         |           |
| Ar       | 2.66(6) | 3.13(6)   |
| Kr       | 2.84(6) | 3.22(6)   |
| Xe       | 3.07(6) | 3.37(6)   |
| O@RG iso |         |           |
| Ar       | 2.66(6) | 3.07(6)   |
| Kr       | 2.84(6) | 3.16(6)   |
| Xe       | 3.07(6) | 3.31(6)   |
| F@RG iso |         |           |
| Ar       | 2.66(6) | 3.03(6)   |
| Kr       | 2.84(6) | 3.13(6)   |
| Xe       | 3.07(6) | 3.28(6)   |
| Ne@RG    |         |           |
| Ar       | 2.66(6) | 3.01(6)   |
| Kr       | 2.84(6) | 3.13(6)   |
| Xe       | 3.07(6) | 3.30(6)   |

TABLE S.19. Minimum O–RG distances ( $\text{\AA}$ ) in the SS site optimized using the isotropic model in comparison with the equivalent distances in the ideal lattice. The number of equivalent RG atoms is given in parentheses.

| RG       | crystal  | isotropic |
|----------|----------|-----------|
| H@RG     |          |           |
| Ar       | 3.76(12) | 3.72(12)  |
| Kr       | 4.01(12) | 3.98(12)  |
| Xe       | 4.34(12) | 4.28(12)  |
| He@RG    |          |           |
| Ar       | 3.76(12) | 3.72(12)  |
| Kr       | 4.01(12) | 3.98(12)  |
| Xe       | 4.34(12) | 4.31(12)  |
| Li@RG    |          |           |
| Ar       | 3.76(12) | 3.91(12)  |
| Kr       | 4.01(12) | 4.08(12)  |
| Xe       | 4.34(12) | 4.36(12)  |
| Be@RG    |          |           |
| Ar       | 3.76(12) | 3.85(12)  |
| Kr       | 4.01(12) | 4.04(12)  |
| Xe       | 4.34(12) | 4.32(12)  |
| B@RG iso |          |           |
| Ar       | 3.76(12) | 3.77(12)  |
| Kr       | 4.01(12) | 3.99(12)  |
| Xe       | 4.34(12) | 4.29(12)  |
| C@RG iso |          |           |
| Ar       | 3.76(12) | 3.73(12)  |
| Kr       | 4.01(12) | 3.97(12)  |
| Xe       | 4.34(12) | 4.29(12)  |
| N@RG     |          |           |
| Ar       | 3.76(12) | 3.72(12)  |
| Kr       | 4.01(12) | 3.96(12)  |
| Xe       | 4.34(12) | 4.29(12)  |
| O@RG iso |          |           |
| Ar       | 3.76(12) | 3.71(12)  |
| Kr       | 4.01(12) | 3.96(12)  |
| Xe       | 4.34(12) | 4.29(12)  |
| F@RG iso |          |           |
| Ar       | 3.76(12) | 3.71(12)  |
| Kr       | 4.01(12) | 3.97(12)  |
| Xe       | 4.34(12) | 4.29(12)  |
| Ne@RG    |          |           |
| Ar       | 3.76(12) | 3.71(12)  |
| Kr       | 4.01(12) | 3.98(12)  |
| Xe       | 4.34(12) | 4.30(12)  |

TABLE S.20. Minimum O–RG distances ( $\text{\AA}$ ) in the IS(DB) and IS(SI) sites optimized using the isotropic model, which are compared to the distances corresponding to equivalent positions if atom was being placed in either IS( $O_h$ ) or SS site in the ideal unperturbed lattice. The number of equivalent RG atoms is given in parentheses.

| RG       | crystal IS( $O_h$ ) | IS(DB)                    | IS(SI)                     | crystal SS |
|----------|---------------------|---------------------------|----------------------------|------------|
| Li@RG    |                     |                           |                            |            |
| Ar       | 2.66(6)             | -                         | 3.99(2), 4.01(1), 4.05(10) | 3.76(12)   |
| Be@RG    |                     |                           |                            |            |
| Ar       | 2.66(6)             | -                         | 3.92(2), 3.97(10), 3.99(1) | 3.76(12)   |
| Kr       | 2.84(6)             | 3.36(1), 3.53(4), 3.84(1) | -                          | 4.01(12)   |
| B@RG iso |                     |                           |                            |            |
| Ar       | 2.66(6)             | -                         | 3.84(2), 3.93(10), 3.97(1) | 3.76(12)   |
| Kr       | 2.84(6)             | 3.29(1), 3.38(4), 3.49(1) | -                          | 4.01(12)   |
| C@RG iso |                     |                           |                            |            |
| Ar       | 2.66(6)             | 3.11(1), 3.22(4), 3.43(1) | -                          | 3.76(12)   |

TABLE S.21. Minimum O–RG distances ( $\text{\AA}$ ) in the optimized TV site structure in comparison with the equivalent distances in the ideal lattice. The number of equivalent RG atoms is given in parentheses.

| System | crystal  | isotropic |
|--------|----------|-----------|
| Li@Ar  | 4.40(12) | 4.42(12)  |
| Be@Ar  | 4.40(12) | 4.35(12)  |



## VI. STRUCTURE OF STABLE TRAPPING SITES. NR DIM MODEL

TABLE S.22. Minimum O–RG distances ( $\text{\AA}$ ) in the  $IS(O_h)$  site optimized using the isotropic and NR models in comparison with the equivalent distances in the ideal lattice. The number of equivalent RG atoms is given in parentheses.

| RG   | crystal | isotropic | NR                        |
|------|---------|-----------|---------------------------|
| B@RG |         |           |                           |
| Ar   | 2.66(6) | 3.31(6)   | 3.12(4), 3.52(2)          |
| Kr   | 2.84(6) | 3.37(6)   | 3.18(4), 3.58(2)          |
| Xe   | 3.07(6) | 3.47(6)   | 3.27(4), 3.70(2)          |
| C@RG |         |           |                           |
| Ar   | 2.66(6) | 3.20(6)   | 2.85(2), 3.29(4)          |
| Kr   | 2.84(6) | 3.27(6)   | 2.86(2), 3.37(4)          |
| Xe   | 3.07(6) | 3.39(6)   | 2.83(2), 3.52(4)          |
| O@RG |         |           |                           |
| Ar   | 2.66(6) | 3.07(6)   | 2.98(4), 3.20(2)          |
| Kr   | 2.84(6) | 3.16(6)   | 3.06(4), 3.29(2)          |
| Xe   | 3.07(6) | 3.31(6)   | 3.20(4), 3.45(2)          |
| F@RG |         |           |                           |
| Ar   | 2.66(6) | 3.03(6)   | 2.81(2), 3.09(4)          |
| Kr   | 2.84(6) | 3.13(6)   | 2.65(2), 3.47(4)          |
| Xe   | 3.07(6) | 3.28(6)   | 2.33(1), 3.42(4), 3.91(1) |

TABLE S.23. Minimum O–RG distances ( $\text{\AA}$ ) in the  $IS(D_{2h})$  site optimized using the isotropic and NR models in comparison with the equivalent distances in the ideal lattice. The number of equivalent RG atoms is given in parentheses.

| RG   | crystal          | NR                                     |
|------|------------------|----------------------------------------|
| B@RG |                  |                                        |
| Ar   | 1.88(2), 3.25(4) | 3.00(2), 3.35(2), 3.62(2) <sup>a</sup> |
| Kr   | 2.01(2), 3.47(4) | 3.02(2), 3.60(4)                       |
| Xe   | 2.17(2), 3.75(4) | 3.06(2), 3.78(4)                       |
| C@RG |                  |                                        |
| Ar   | 1.88(2), 3.25(4) | 2.71(2), 3.47(4)                       |
| Kr   | 2.01(2), 3.47(4) | 2.69(2), 3.60(4)                       |
| Xe   | 2.17(2), 3.75(4) | 2.65(2), 3.80(4)                       |
| F@RG |                  |                                        |
| Ar   | 1.88(2), 3.25(4) | 2.66(2), 3.30(4)                       |
| Kr   | 2.01(2), 3.47(4) | 2.65(2), 3.47(4)                       |
| Xe   | 2.17(2), 3.75(4) | 2.35(2), 3.75(4)                       |

<sup>a</sup> Although the structure is differently distorted from the case of C and F, it is still IS D2h

TABLE S.24. Minimum O–RG distances (Å) in the SS site optimized using the isotropic and NR models in comparison with the equivalent distances in the ideal lattice. The number of equivalent RG atoms is given in parentheses.

| RG   | crystal  | isotropic | NR                                          |
|------|----------|-----------|---------------------------------------------|
| B@RG |          |           |                                             |
| Ar   | 3.76(12) | 3.77(12)  | 3.68(6), 3.85(6)                            |
| Kr   | 4.01(12) | 3.99(12)  | 3.92(6), 4.05(6)                            |
| Xe   | 4.34(12) | 4.29(12)  | 4.24(6), 4.33(6)                            |
| C@RG |          |           |                                             |
| Ar   | 3.76(12) | 3.73(12)  | 3.56(2), 3.76(10)                           |
| Kr   | 4.01(12) | 3.97(12)  | 3.94(8), 4.01(4)                            |
| Xe   | 4.34(12) | 4.29(12)  | 3.05(1), 3.98(4), 4.38(2), 4.88(4), 5.30(1) |
| O@RG |          |           |                                             |
| Ar   | 3.76(12) | 3.71(12)  | 3.68(6), 3.74(6)                            |
| Kr   | 4.01(12) | 3.96(12)  | 3.94(4), 3.98(8)                            |
| Xe   | 4.34(12) | 4.29(12)  | 4.28(4), 4.30(8)                            |
| F@RG |          |           |                                             |
| Ar   | 3.76(12) | 3.71(12)  | 3.70(8), 3.73(4)                            |
| Kr   | 4.01(12) | 3.97(12)  | 3.96(8), 3.98(4)                            |
| Xe   | 4.34(12) | 4.29(12)  | 4.29(8), 4.30(4)                            |

## VII. CALCULATED VIBRATIONAL FREQUENCIES OF CENTRAL ATOM WITHIN ALL STABLE TRAPPING SITES

TABLE S.25. Central atom vibrational frequencies for IS( $O_h$ ) sites within Einstein approximation for isotropic and NR DIM models

| RG    | isotropic     | NR            |
|-------|---------------|---------------|
| H@RG  |               |               |
| Ar    | 332, 332, 332 |               |
| Kr    | 337, 337, 337 |               |
| Xe    | 316, 316, 316 |               |
| He@RG |               |               |
| Ar    | 182, 182, 182 |               |
| Kr    | 187, 187, 187 |               |
| Xe    | 187, 187, 187 |               |
| Li@RG |               |               |
| Ar    | 76, 76, 76    |               |
| Kr    | 70, 70, 70    |               |
| Xe    | 83, 83, 83    |               |
| Be@RG |               |               |
| Ar    | 130, 130, 130 |               |
| Kr    | 140, 140, 140 |               |
| Xe    | 148, 148, 148 |               |
| B@RG  |               |               |
| Ar    | 127, 127, 127 | 126, 126, 141 |
| Kr    | 134, 134, 134 | 131, 131, 154 |
| Xe    | 140, 140, 140 | 132, 132, 165 |
| C@RG  |               |               |
| Ar    | 125, 125, 125 | 119, 136, 136 |
| Kr    | 132, 132, 132 | 122, 146, 146 |
| Xe    | 135, 135, 135 | 125, 158, 158 |
| N@RG  |               |               |
| Ar    | 117, 117, 117 |               |
| Kr    | 124, 124, 124 |               |
| Xe    | 126, 126, 126 |               |
| O@RG  |               |               |
| Ar    | 109, 109, 109 | 107, 107, 116 |
| Kr    | 114, 114, 114 | 109, 109, 123 |
| Xe    | 114, 114, 114 | 104, 104, 129 |
| F@RG  |               |               |
| Ar    | 99, 99, 99    | 91, 104, 104  |
| Kr    | 103, 103, 103 | 84, 109, 109  |
| Xe    | 101, 101, 101 | 45, 127, 127  |
| Ne@RG |               |               |
| Ar    | 96, 96, 96    |               |
| Kr    | 99, 99, 99    |               |
| Xe    | 101, 101, 101 |               |

TABLE S.26. Central atom vibrational frequencies for IS( $D_{2h}$ ) sites within Einstein approximation for NR DIM model

| RG       | Frequencies, $\text{cm}^{-1}$ |
|----------|-------------------------------|
| B@RG     |                               |
| Ar       | 73, 120, 169                  |
| Kr       | 57, 119, 186                  |
| Xe       | 46, 111, 120                  |
| C@RG     |                               |
| Ar       | 82, 120, 168                  |
| Kr       | 88, 126, 185                  |
| Xe       | 106, 136, 218                 |
| F@RG iso |                               |
| Ar       | 45, 75, 137                   |
| Kr       | 51, 77, 139                   |
| Xe       | 117, 126, 225                 |

TABLE S.27. Central atom vibrational frequencies for IS(DB) sites within Einstein approximation for isotropic model

| RG       | Frequencies, $\text{cm}^{-1}$ |
|----------|-------------------------------|
| Be@RG    |                               |
| Kr       | 129, 129, 151                 |
| B@RG iso |                               |
| Kr       | 130, 130, 138                 |
| C@RG iso |                               |
| Ar       | 116, 116, 131                 |

TABLE S.28. Central atom vibrational frequencies for IS(SI) sites within Einstein approximation for isotropic model

| RG       | Frequencies, $\text{cm}^{-1}$ |
|----------|-------------------------------|
| Li@RG    |                               |
| Ar       | 88, 89, 89                    |
| Be@RG    |                               |
| Ar       | 93, 93, 96                    |
| B@RG iso |                               |
| Ar       | 64, 67, 73                    |

## VIII. PREEXPONENTS $\nu$ USED IN STST CALCULATIONS

TABLE S.29. Approximate vibrational frequencies of the mode directed along the  $IS(O_h)$ – $IS^*(D_{2h})$ – $IS(O_h)$  migration path and the preexponents  $\nu$  used in STST calculations within the isotropic model.

|       | $\omega(\text{cm}^{-1})$ | $\nu(\text{s}^{-1})$  |
|-------|--------------------------|-----------------------|
| H@RG  |                          |                       |
| Ar    | 333                      | $9.97 \times 10^{12}$ |
| Kr    | 337                      | $1.01 \times 10^{13}$ |
| Xe    | 316                      | $9.48 \times 10^{12}$ |
| D@RG  |                          |                       |
| Ar    | 236                      | $7.08 \times 10^{12}$ |
| Kr    | 239                      | $7.17 \times 10^{12}$ |
| Xe    | 234                      | $7.02 \times 10^{12}$ |
| He@RG |                          |                       |
| Ar    | 182                      | $5.46 \times 10^{12}$ |
| Kr    | 186                      | $5.59 \times 10^{12}$ |
| Xe    | 187                      | $5.62 \times 10^{12}$ |
| Li@RG |                          |                       |
| Kr    | 70                       | $2.09 \times 10^{12}$ |
| Xe    | 83                       | $2.48 \times 10^{12}$ |
| Be@RG |                          |                       |
| Xe    | 148                      | $4.44 \times 10^{12}$ |
| B@RG  |                          |                       |
| Kr    | 133                      | $3.99 \times 10^{12}$ |
| Xe    | 140                      | $4.21 \times 10^{12}$ |
| C@RG  |                          |                       |
| Ar    | 124                      | $3.72 \times 10^{12}$ |
| Kr    | 132                      | $3.95 \times 10^{12}$ |
| Xe    | 135                      | $4.04 \times 10^{12}$ |
| N@RG  |                          |                       |
| Ar    | 117                      | $3.51 \times 10^{12}$ |
| Kr    | 124                      | $3.72 \times 10^{12}$ |
| Xe    | 126                      | $3.79 \times 10^{12}$ |
| O@RG  |                          |                       |
| Ar    | 109                      | $3.26 \times 10^{12}$ |
| Kr    | 114                      | $3.42 \times 10^{12}$ |
| Xe    | 113                      | $3.39 \times 10^{12}$ |
| F@RG  |                          |                       |
| Ar    | 99                       | $2.98 \times 10^{12}$ |
| Kr    | 103                      | $3.08 \times 10^{12}$ |
| Xe    | 102                      | $3.05 \times 10^{12}$ |
| Ne@RG |                          |                       |
| Ar    | 96                       | $2.88 \times 10^{12}$ |
| Kr    | 99                       | $2.98 \times 10^{12}$ |
| Xe    | 101                      | $3.03 \times 10^{12}$ |

TABLE S.30. Approximate vibrational frequencies of the mode directed along the migration path and the preexponents  $\nu$  used in STST calculations within the NR DIM model.

| Path type |                                           | $\omega(\text{cm}^{-1})$ | $\nu(\text{s}^{-1})$  |
|-----------|-------------------------------------------|--------------------------|-----------------------|
| B NR      |                                           |                          |                       |
| Ar        | IS( $D_{2h}$ )-IS( $O_h$ )-IS( $D_{2h}$ ) | 74                       | $2.21 \times 10^{12}$ |
| Kr        | IS( $O_h$ )-IS( $D_{2h}$ )-IS( $O_h$ )    | 131                      | $3.93 \times 10^{12}$ |
| Xe        | IS( $O_h$ )-IS( $D_{2h}$ )-IS( $O_h$ )    | 149                      | $4.47 \times 10^{12}$ |
| C NR      |                                           |                          |                       |
| Ar        | IS( $D_{2h}$ )-IS( $O_h$ )-IS( $D_{2h}$ ) | 82                       | $2.45 \times 10^{12}$ |
| Kr        | IS( $D_{2h}$ )-IS( $O_h$ )-IS( $D_{2h}$ ) | 88                       | $2.65 \times 10^{12}$ |
| Xe        | IS( $D_{2h}$ )-IS* -IS( $D_{2h}$ )        | 136                      | $4.09 \times 10^{12}$ |
| O NR      |                                           |                          |                       |
| Ar        | IS( $O_h$ )-IS*( $D_{2h}$ )-IS( $O_h$ )   | 112                      | $3.35 \times 10^{12}$ |
| Kr        | IS( $O_h$ )-IS*( $D_{2h}$ )-IS( $O_h$ )   | 117                      | $3.50 \times 10^{12}$ |
| Xe        | IS( $O_h$ )-IS*( $D_{2h}$ )-IS( $O_h$ )   | 116                      | $3.49 \times 10^{12}$ |
